# Supplementary material for: Directly induced human Schwann cell precursors as a valuable source of Schwann cells
Source: PubMed Central journal article supplement (PMC7318441; doi:10.1186/s13287-020-01772-x), 2020-06-26

# Figure S1

**A**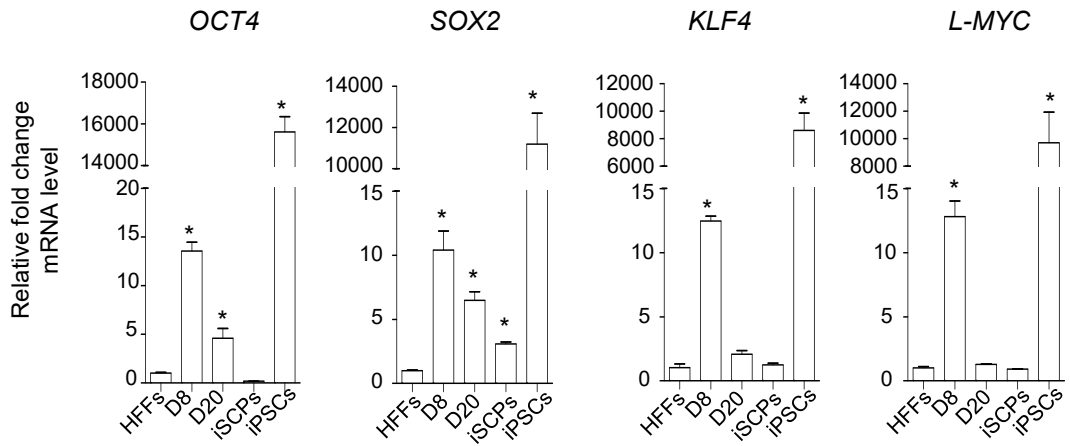**B**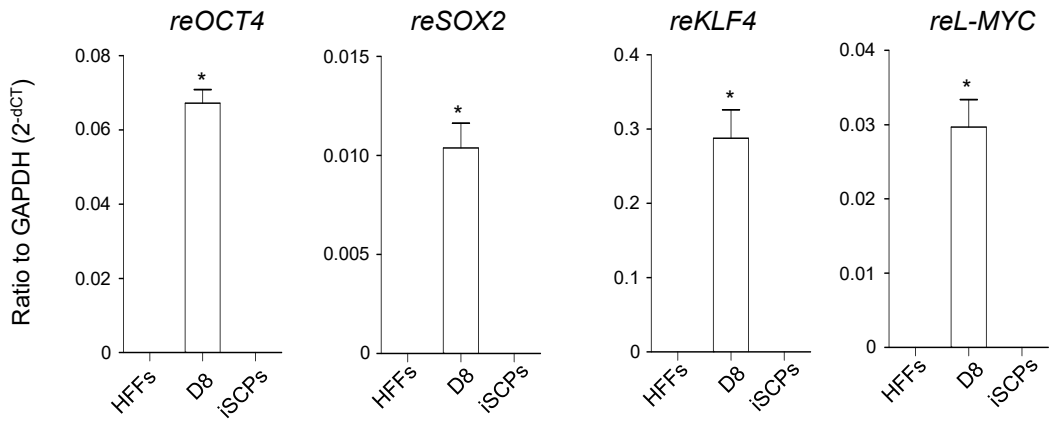

# Figure S2

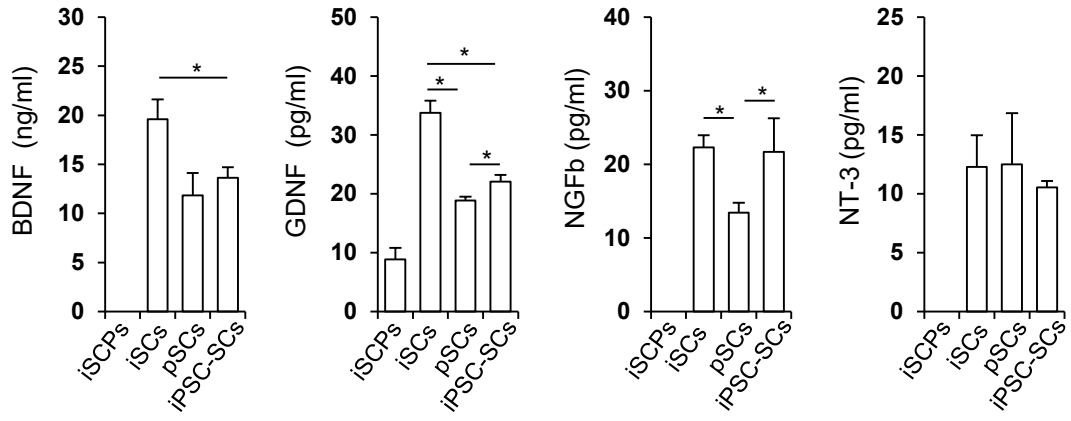

# Figure S3

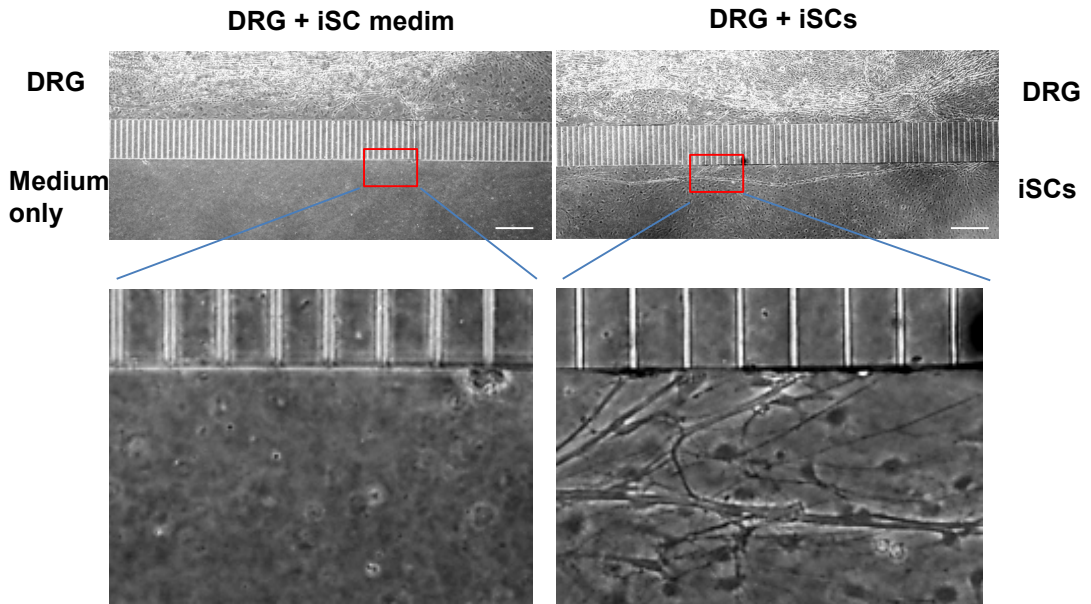

Supplement: 13287_2020_1772_MOESM1_ESM.pdf [file 13287_2020_1772_MOESM1_ESM.pdf]
